# Supplementary material for: Discovery of small-molecule positive allosteric modulators of Parkin E3 ligase
Source: PubMed Central journal article supplement — iScience. 2021 Dec 18;25(1):103650. doi: 10.1016/j.isci.2021.103650 (PMC8733272; doi:10.1016/j.isci.2021.103650), 2021-12-18
Supplement: mmc1.pdf [file mmc1.pdf]

**Supplemental information**

**Discovery of small-molecule positive  
allosteric modulators of Parkin E3 ligase**

**Evgeny Shlevkov, Paramasivam Murugan, Dan Montagna, Eric Stefan, Adelajda Hadzipasic, James S. Harvey, P. Rajesh Kumar, Sonya Entova, Nupur Bansal, Shari Bickford, Lai-Yee Wong, Warren D. Hirst, Andreas Weihofen, and Laura F. Silvan**

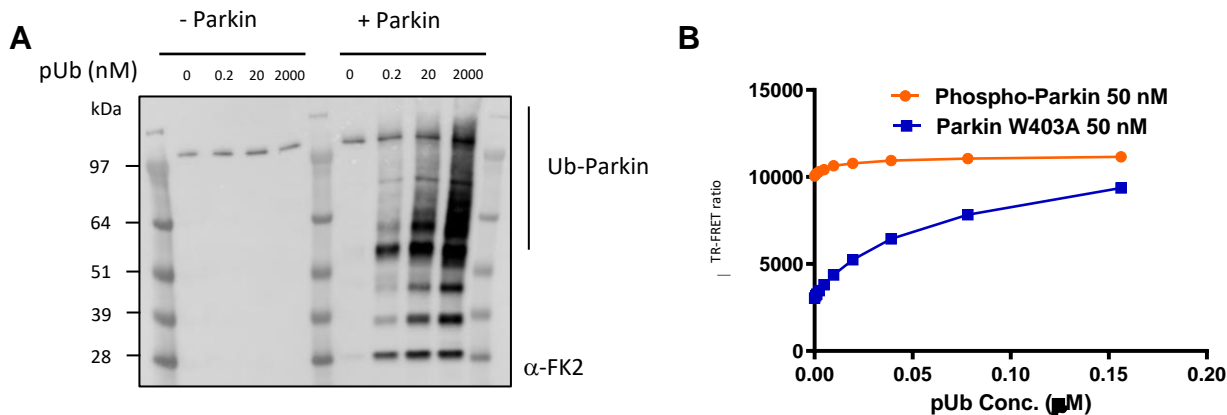

**Figure S1. Primary assay development – Related to Figure 1.** A) FK2 antibody detects Parkin autoubiquitination as measured by Western blot. Ubiquitin chains with increasing length are generated with increasing levels of pUb in an *in vitro* reaction. B) The TR-FRET signal vs. pUb concentration for W403A-Parkin and phospho-Parkin. W403A-Parkin is pUb-dependent and is not as active as phospho-Parkin, which is pUb-independent. These curves represent n=1 technical and biological replicate.

A

400K-Biogen compounds screened  
at 30  $\mu\text{M}$  concentration

↓  $EC_{50}$

1,771 compounds selected  
for hit confirmation

30  $\mu\text{M}$  in primary assay format (WT  
Parkin) and counter-screen assay  
(C431S mutant Parkin)

↓

536 selected for dose response  
(200  $\mu\text{M}$ , 1:2 dil, N=2)

↓

| Mean $EC_{50}$         | No. of compounds |
|------------------------|------------------|
| 1 - 5 $\mu\text{M}$    | 6                |
| 5 < 10 $\mu\text{M}$   | 28               |
| 10 < 20 $\mu\text{M}$  | 79               |
| 20 < 50 $\mu\text{M}$  | 91               |
| 50 < 200 $\mu\text{M}$ | 46               |
| > 200 $\mu\text{M}$    | 286              |

B

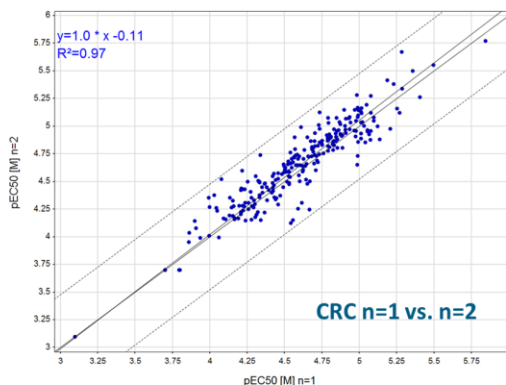

Good correlation observed between duplicate  $EC_{50}$   
value determinations

C Cluster A

Cluster B

THPP series

BIO-1953559

BIO-0550701

BIO-1741376

BIO-2007817

BIO-2007818

BIO-1984542

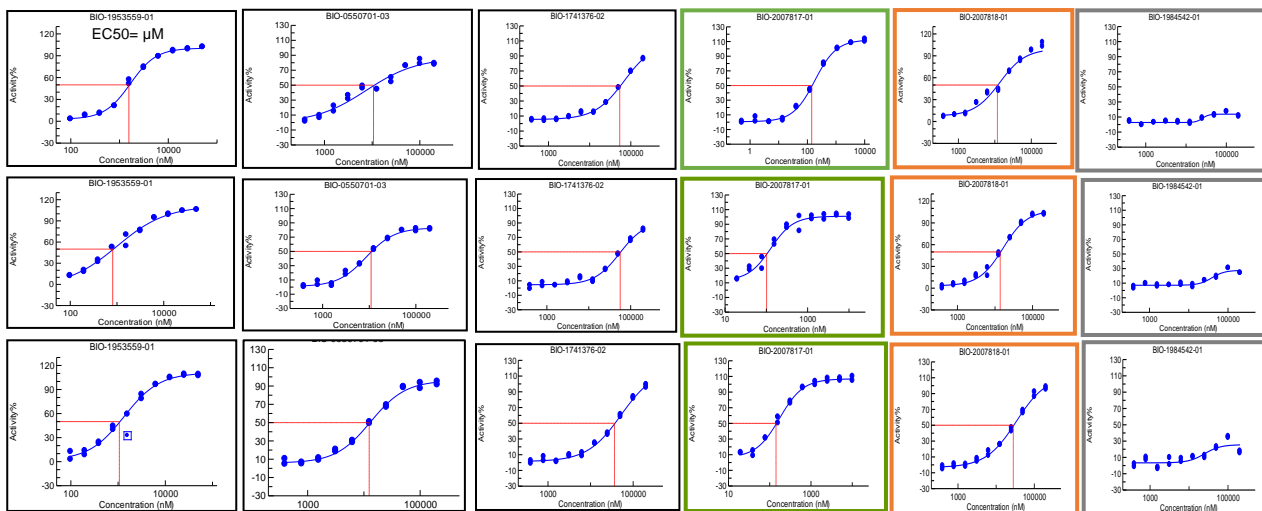

**Figure S2. HTS screening platform and data analysis – Related to Figure 2.** A) Hit-triage scheme for HTS. B) Correlation between duplicate  $EC_{50}$  value determinations for 536 selected compounds. C) Measurements of concentration response curves for key compounds in Cluster A (BIO1953559 is the single active enantiomer of BIO-0030130 racemate), Cluster B (BIO-0050701), original singleton THPP compound hit BIO-1741376, and representative THPP compounds (BIO-2007817, BIO-2007818 and BIO-1984542). Panel C represents n=3 biological replicates and n=2 technical replicates.

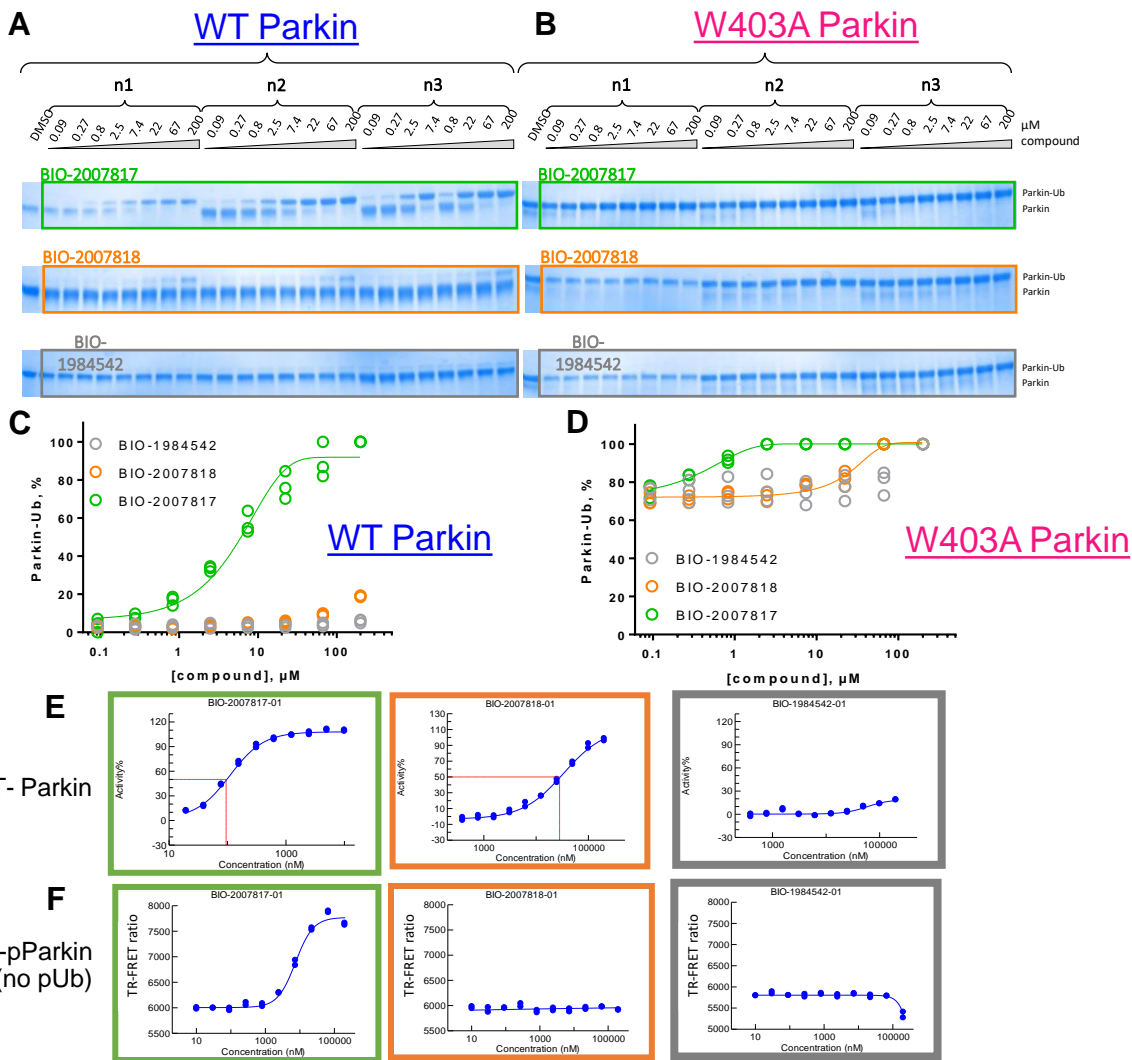

**Figure S3. Compounds accelerate Ub-charging regardless for various Parkin activation states – Related to Figure 4.** Gel cutouts demonstrating the % charging for A) WT- and B) W403A-Parkin with respect to compound concentrations, n=3 biological replicates. Note that there is a gel loading mistake in n=3 in which 2.5 and 7.4uM compound lanes were swapped, but the quantitation is corrected in the curve in Fig. S3C. C-D) Quantitation of the charging % is shown in C for WT-Parkin and D for W403A-Parkin. TR-FRET autoubiquitination activity assay comparing the 3 THPP compounds in ability to activate WT-Parkin with pUb (Normalized to W403A Parkin in E) and pParkin without pUb (TR-FRET ratio in F) demonstrating that BIO-2007817 activating compound (green) is able to activate both forms of Parkin. Curves in E and F represent n=2 technical replicates and n=1 biological replicates.

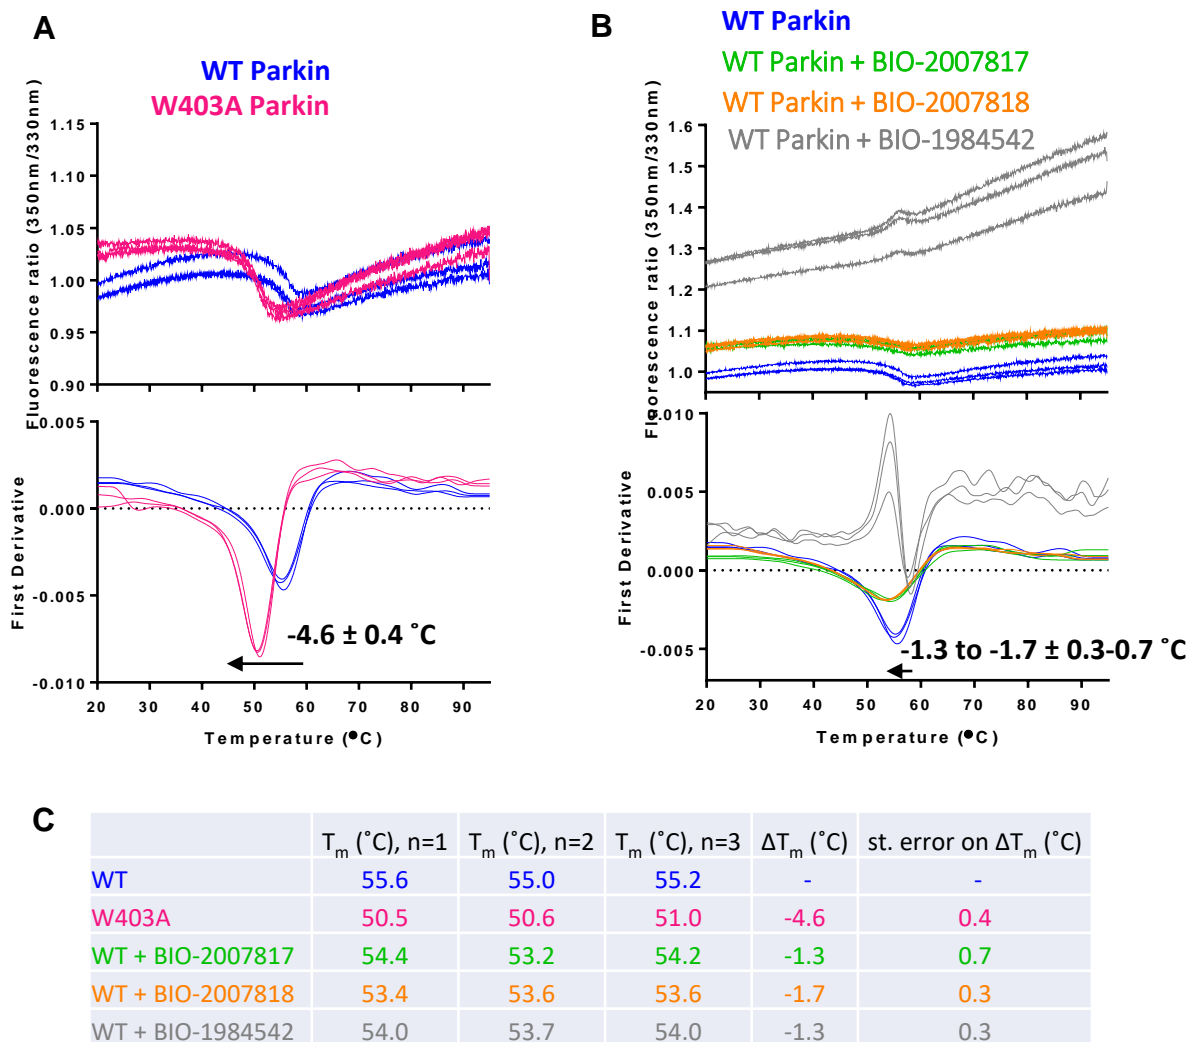

**Figure S4. Compounds alone do not recapitulate the extent of destabilization on Parkin structure imparted by activating W403A-Parkin mutant – Related to Figure 4.**

A) Activating W403A-Parkin mutant is 4.6 °C less thermally stable than WT-Parkin whereas B) compounds only impart 1.3-1.7 °C destabilization which is not consistent with their ranked potency. C) Data summary. Experiments were conducted in triplicates.  $\Delta T_m$  is reported on change in average values and standard error is calculated as the sum of square errors of averaged  $T_m$ .

**A**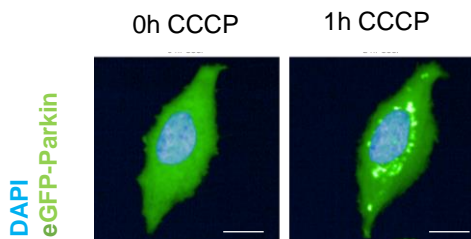**B**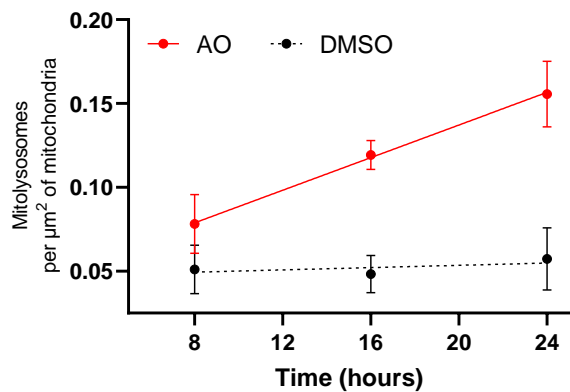

**Figure S5. Compounds do not affect the rate of Parkin translocation to mitochondria – Related to Figure 5.** A) eGFP-Parkin stable HELA cell line showing perinuclear clustering of GFP signal upon CCCP activation consistent with mitochondrial localization. B) Time-course of MitoQC signal accumulation in stable SH-SY5Y cells upon treatment with 5  $\mu$ M Antimycin A + 10  $\mu$ M Oligomycin. Data averaged from 6 wells, error bars represent standard deviation.

Figure 4A

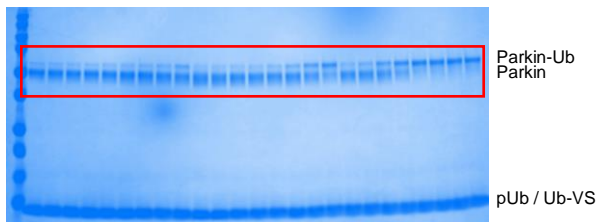

Figure 4C

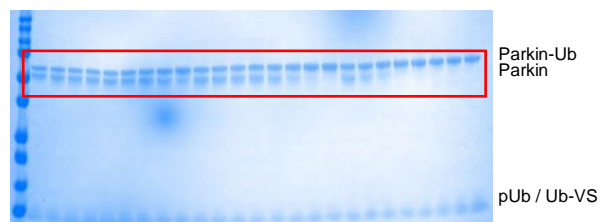

Figure 4E

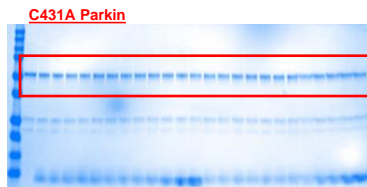

Figure 4F

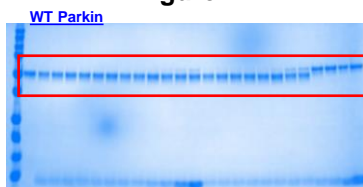

Figure 4G

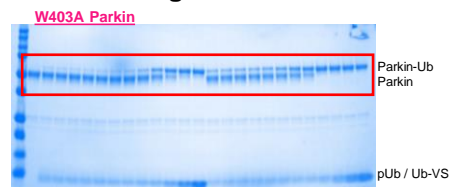

Figure S3A

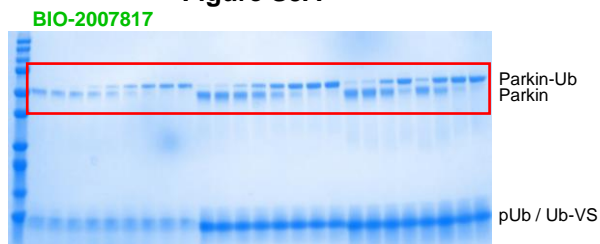

Figure S3B

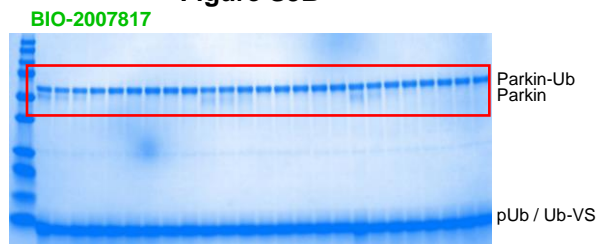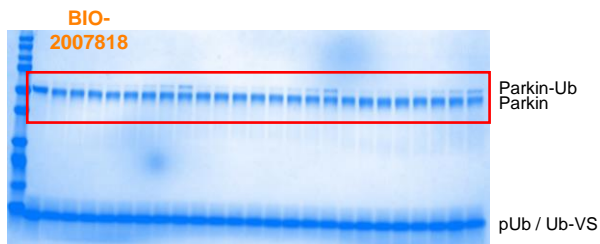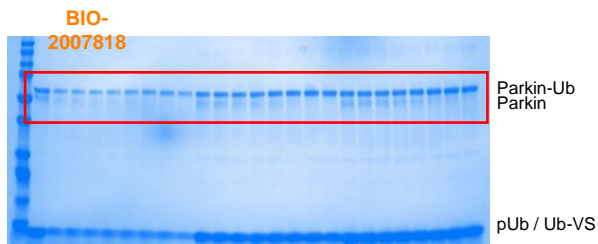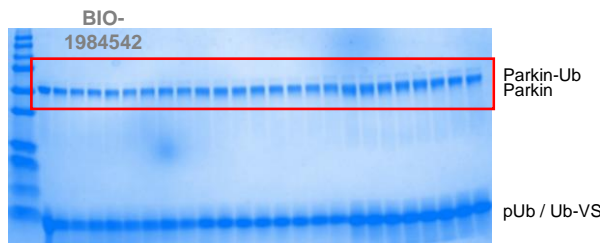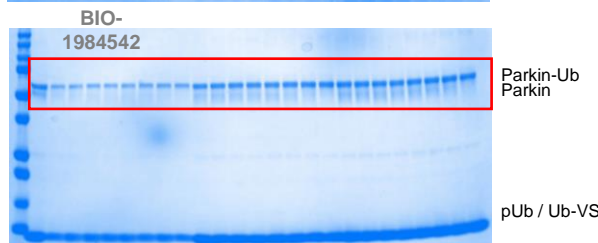

Figure S6. Full gels used Figure 4 and Figure S4 with cut-out area shown in red rectangles – Related to Figure 4.

**Table S1 Technical details of the high-throughput screen for Parkin small molecule activators – Related to Figure 2 and STAR Methods.**

| Category          | Parameter                                                                                            | Description                                                                                                                                                    |
|-------------------|------------------------------------------------------------------------------------------------------|----------------------------------------------------------------------------------------------------------------------------------------------------------------|
| Assay             | In vitro                                                                                             | TR-FRET                                                                                                                                                        |
|                   | Target                                                                                               | 20 nM E1, 400 nM E2, 50 nM E3, 380 nM F-UB, 25 $\mu$ M Ub, 5 $\mu$ M pUB, 1 mM ATP, 7.5 nM Tb-labeled FK2 ab, 20 mM EDTA                                       |
|                   | Detection of TR-FRET                                                                                 | Excitation 340 nm, Emission-520 nm & 490 nm                                                                                                                    |
|                   | Controls                                                                                             | Positive control 20 nM W403A-Parkin<br>Negative control 20 nM C431S -Parkin                                                                                    |
|                   | Assay time and temperature                                                                           | 2 hrs ; 37°C                                                                                                                                                   |
|                   | Ec <sub>50</sub> pUb                                                                                 |                                                                                                                                                                |
| Library           | 400,000 compounds                                                                                    |                                                                                                                                                                |
|                   | Biogen                                                                                               |                                                                                                                                                                |
| Screen            | 1536 well plates                                                                                     | Oct 24, 2018 – Nov 26, 2018                                                                                                                                    |
|                   | 10mM compounds with X % DMSO                                                                         | Plate acceptance criteria:<br><br>Robust Z' value > 0.5, assay window > 2, track consistency of Ec <sub>100</sub> pUb control wells, no obvious plate effects. |
|                   | C431S & W403A Parkin control                                                                         |                                                                                                                                                                |
|                   | Reagent/compound dispensing system                                                                   |                                                                                                                                                                |
|                   | Envision 2103 Multilabel Readers, Perkin Elmer                                                       |                                                                                                                                                                |
|                   | Z'=0.84 Assay window 2.8 $\pm$ 0.6                                                                   |                                                                                                                                                                |
|                   | Activation for compound median + 3 SD gives Hit cutoff rate 15% of control, 536 hits, 0.13% hit rate |                                                                                                                                                                |
| Post-HTS analysis | Repetition and confirmation at 10 $\mu$ M concentration response                                     |                                                                                                                                                                |
|                   | 536 compounds (Hit rate = 0.13%)<br>n=2                                                              |                                                                                                                                                                |
|                   | 474 compounds passed CRC and QC                                                                      |                                                                                                                                                                |
|                   | Repurchased hits to confirm purity                                                                   |                                                                                                                                                                |
